# Supplementary material
Source: PubMed Central journal article supplement (PMC4683117)

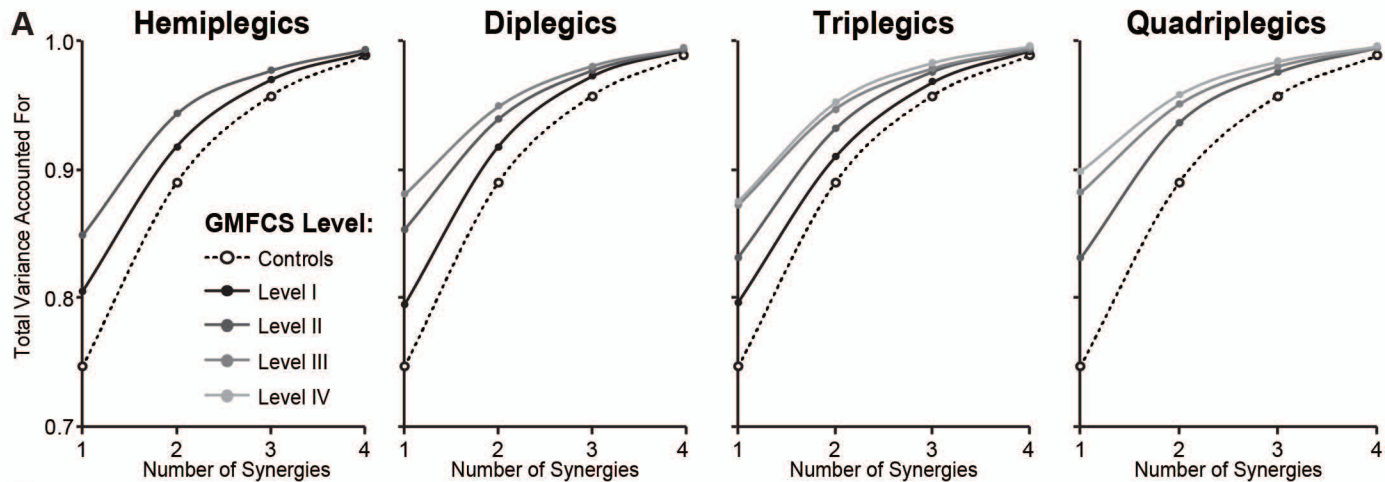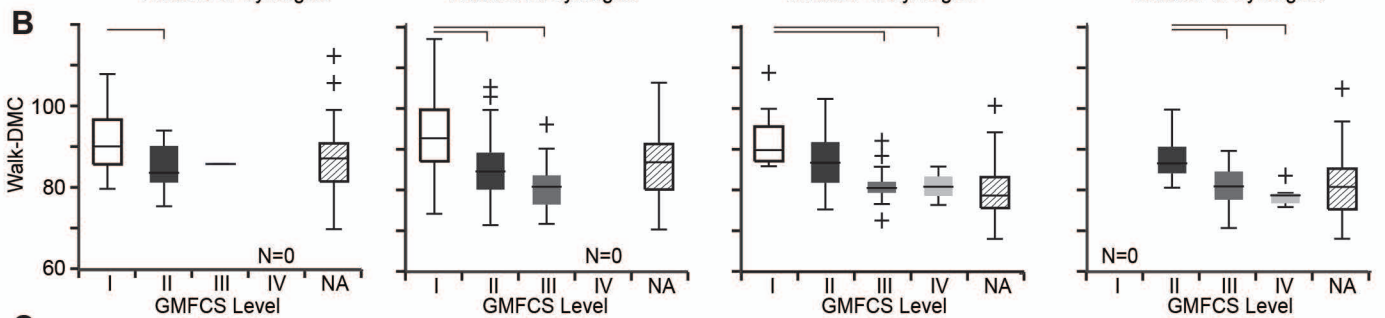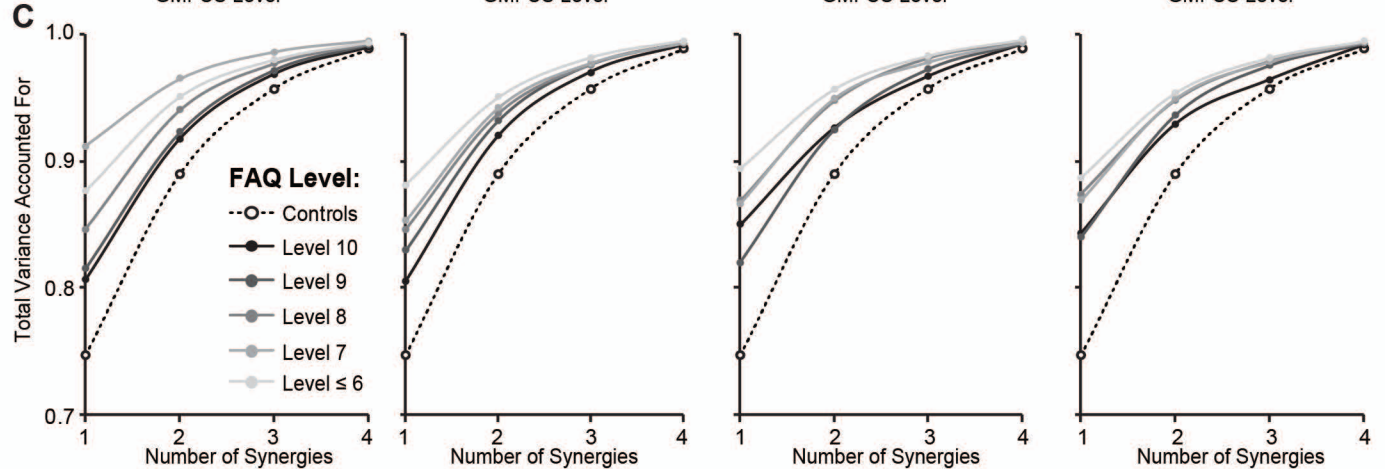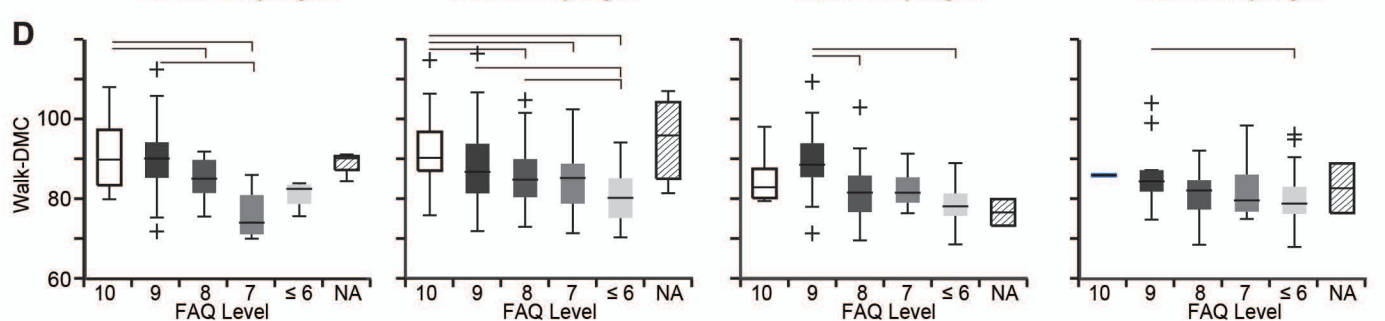

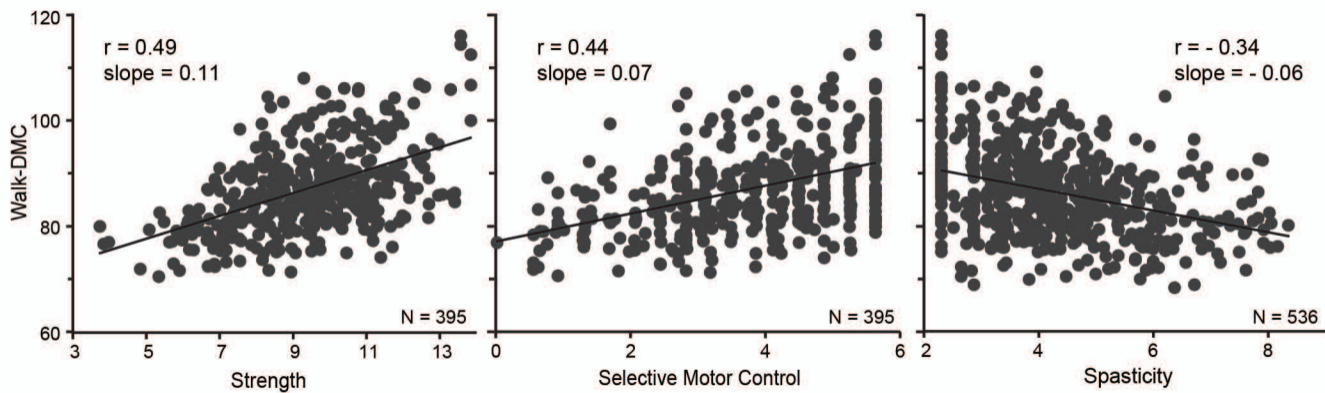

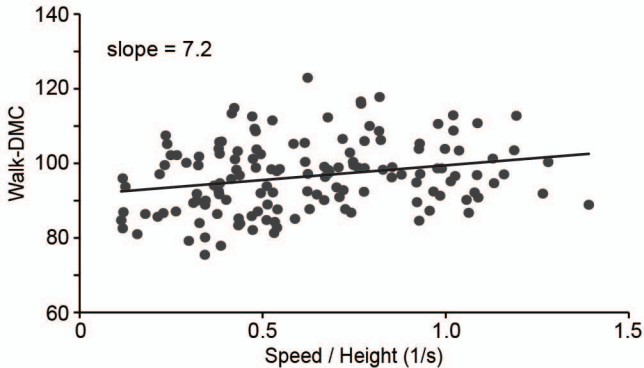

Supplement: NIHMS697756-supplement-Supp_FigureS1-S3.pdf [file NIHMS697756-supplement-Supp_FigureS1-S3.pdf]
